# Supplementary material for: On the need for bundle-specific microstructure kernels in diffusion MRI
Source: PubMed Central journal article supplement (PMC7014821; doi:10.1016/j.neuroimage.2019.116460), 2020-03
Supplement: mmc1.pdf [file mmc1.pdf]

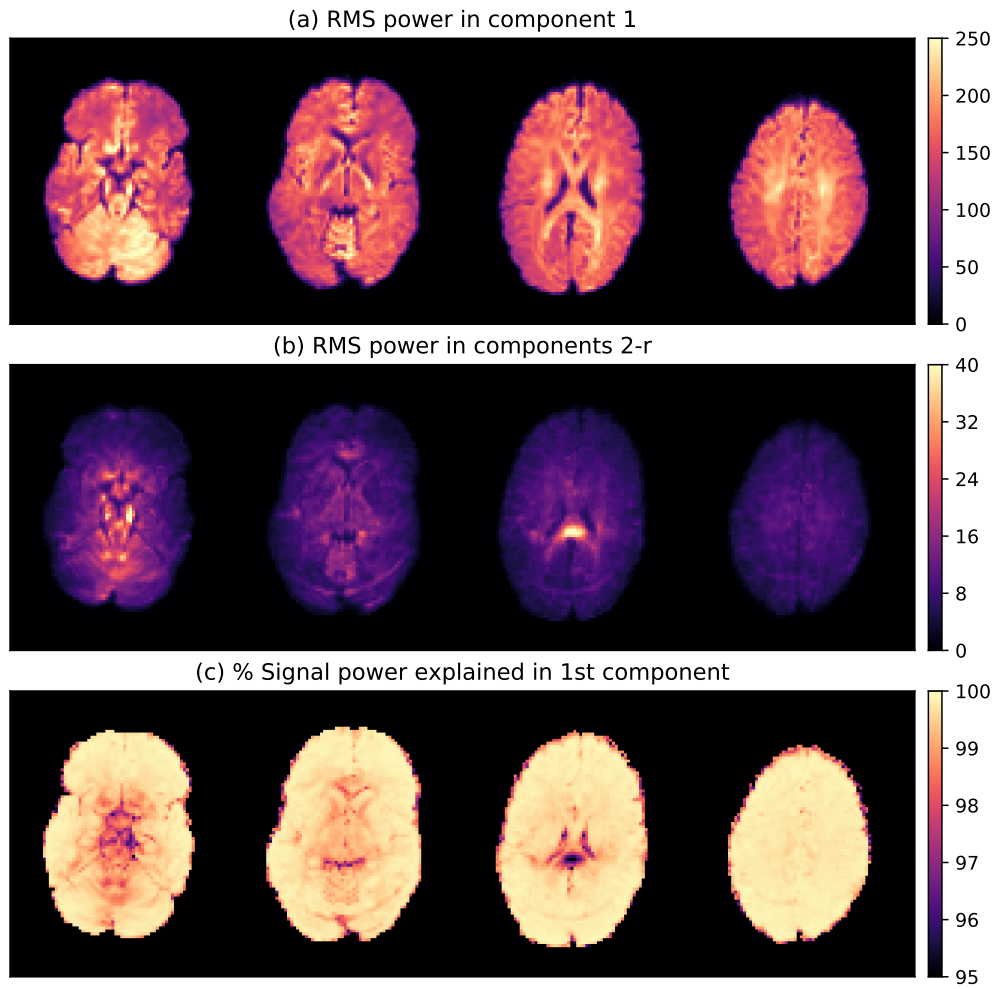

Figure S.1: Signal power (ratio) in the leading component in Subject 1. (a) The root-mean-squared (RMS) signal power  $\sigma_1$  in the principal voxel-wise SHARD component. (b) The total RMS signal power in components 2 to  $r$ , i.e.,  $\sqrt{\sum_{i=2}^r \sigma_i^2}$ . (c) The ratio  $R$  of the signal power explained in the first component.

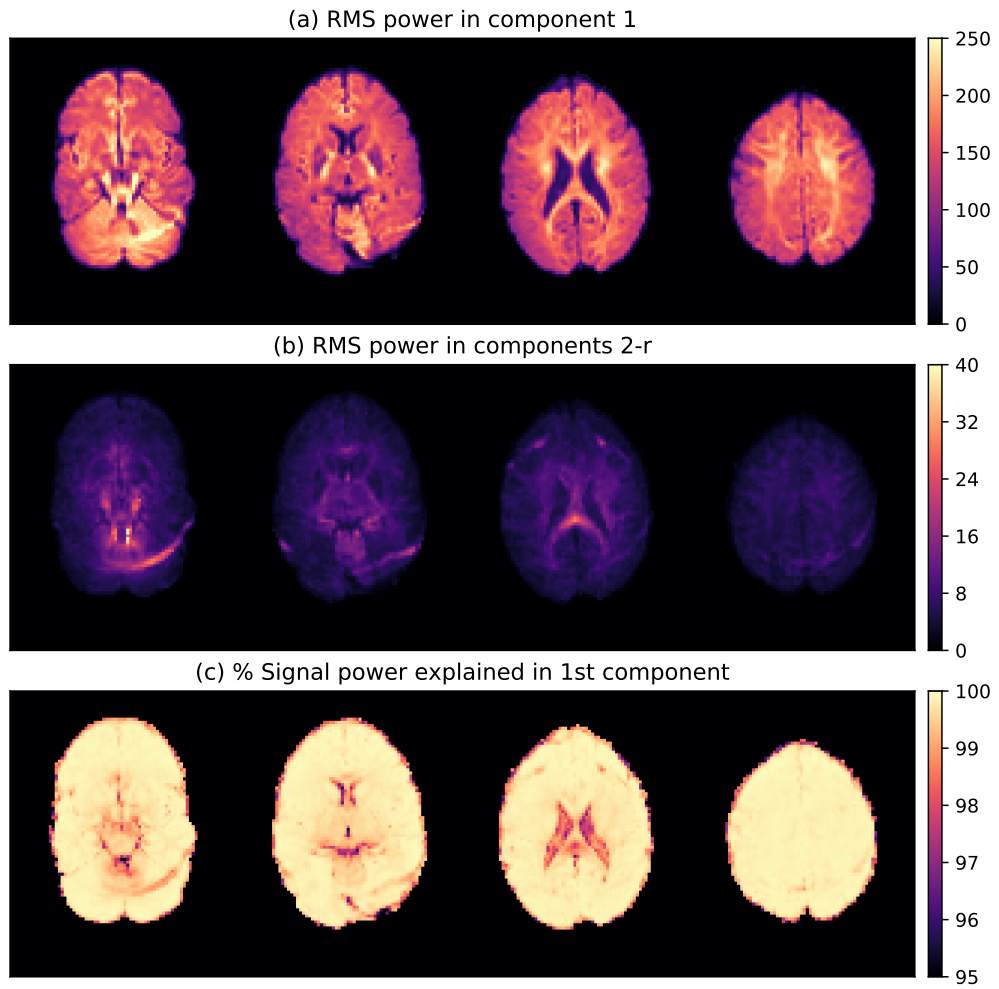

Figure S.2: Signal power (ratio) in the leading component in Subject 2. (a) The root-mean-squared (RMS) signal power  $\sigma_1$  in the principal voxel-wise SHARD component. (b) The total RMS signal power in components 2 to  $r$ , i.e.,  $\sqrt{\sum_{i=2}^r \sigma_i^2}$ . (c) The ratio  $R$  of the signal power explained in the first component.

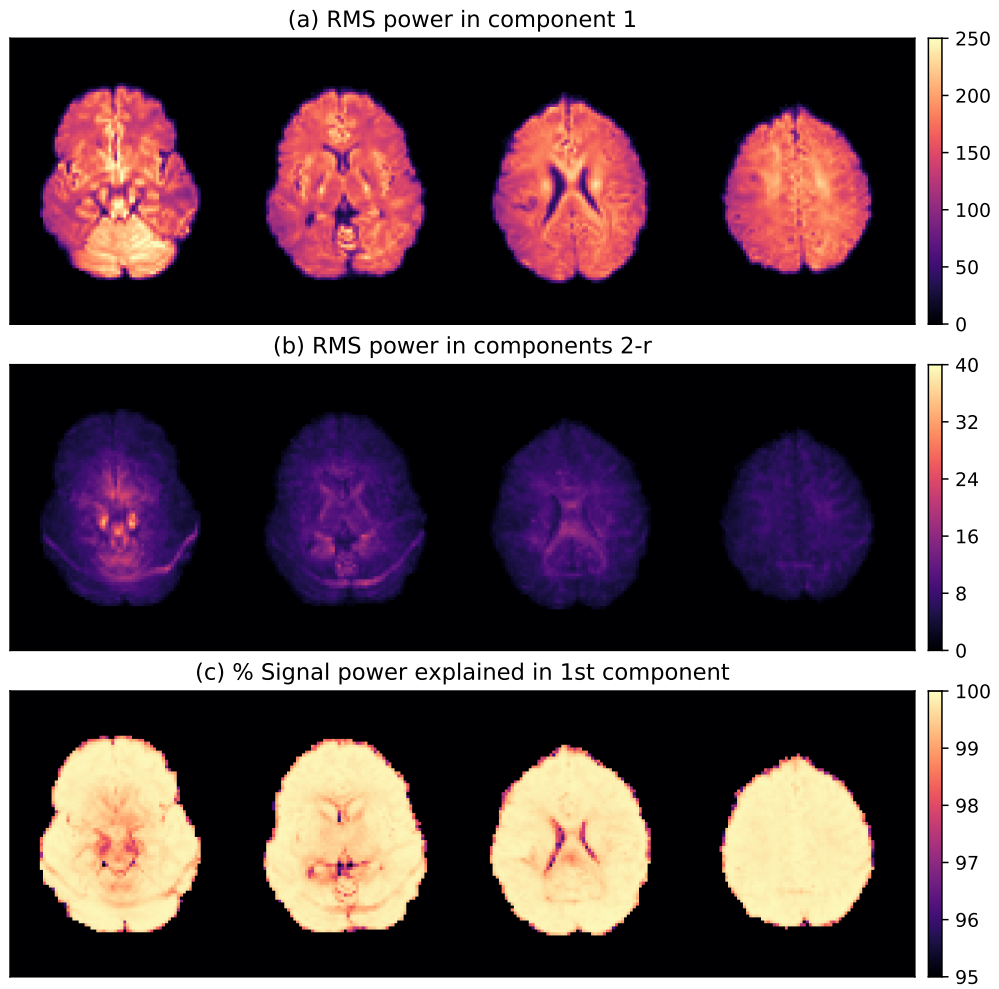

Figure S.3: Signal power (ratio) in the leading component in Subject 3. (a) The root-mean-squared (RMS) signal power  $\sigma_1$  in the principal voxel-wise SHARD component. (b) The total RMS signal power in components 2 to  $r$ , i.e.,  $\sqrt{\sum_{i=2}^r \sigma_i^2}$ . (c) The ratio  $R$  of the signal power explained in the first component.

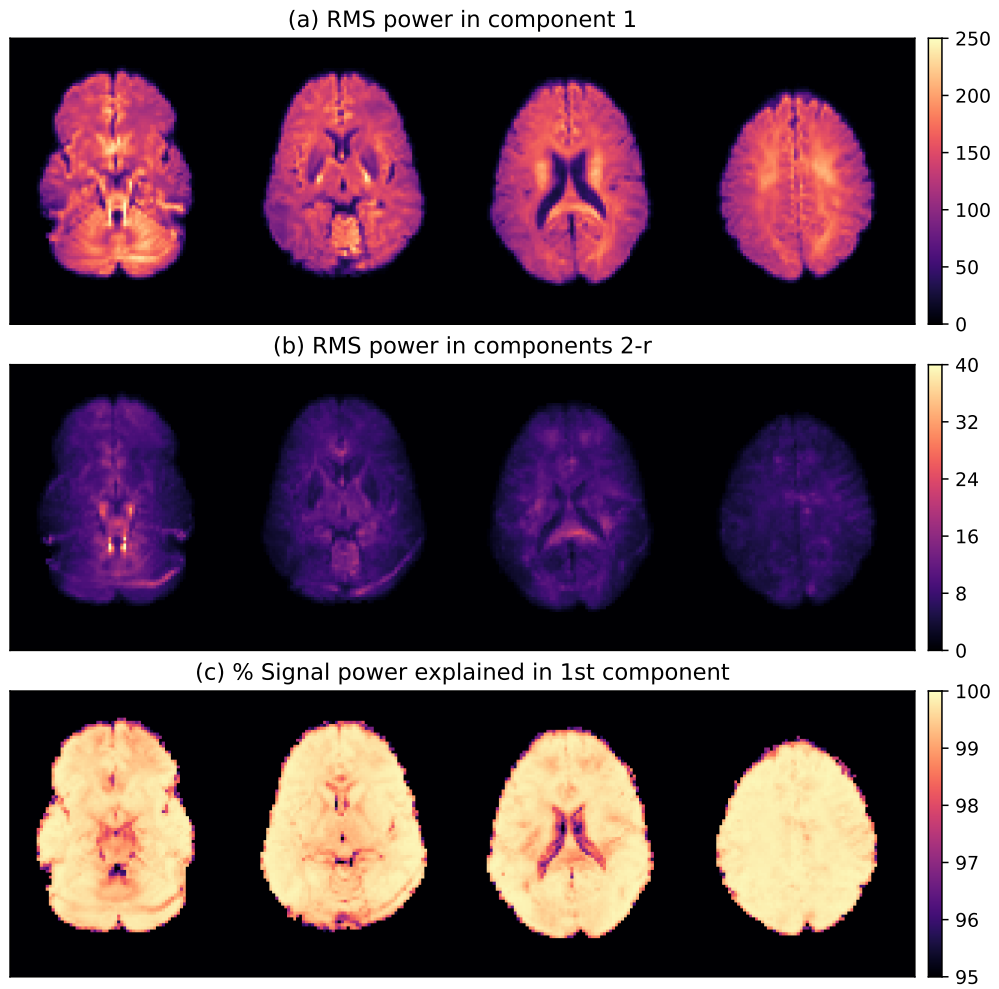

Figure S.4: Signal power (ratio) in the leading component in Subject 4. (a) The root-mean-squared (RMS) signal power  $\sigma_1$  in the principal voxel-wise SHARD component. (b) The total RMS signal power in components 2 to  $r$ , i.e.,  $\sqrt{\sum_{i=2}^r \sigma_i^2}$ . (c) The ratio  $R$  of the signal power explained in the first component.

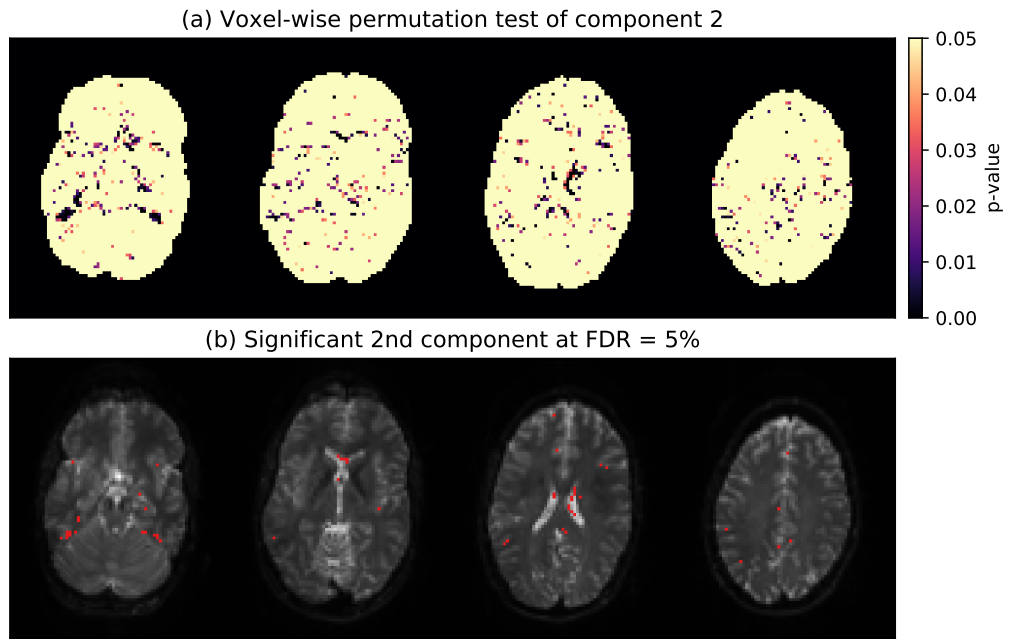

Figure S.5: Permutation testing in Subject 1 to determine if component 2 contains any meaningful structure. (a)  $p$ -value of a voxel-wise residual bootstrapping test. (b) Significant voxels ( $\alpha = 0.05$ ; shown in red) overlaid onto the mean  $b = 0$  image. Significance is determined after correcting for multiple comparisons using the Benjamini-Hochberg False Discovery Rate procedure with  $\alpha = 0.05$ .

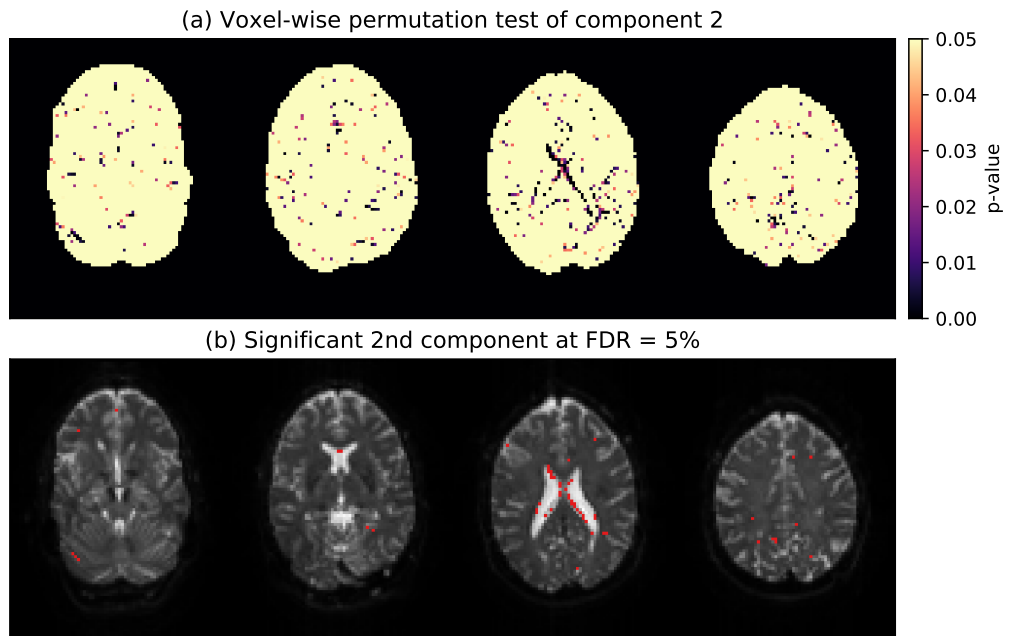

Figure S.6: Permutation testing in Subject 2 to determine if component 2 contains any meaningful structure. (a)  $p$ -value of a voxel-wise residual bootstrapping test. (b) Significant voxels ( $\alpha = 0.05$ ; shown in red) overlaid onto the mean  $b = 0$  image. Significance is determined after correcting for multiple comparisons using the Benjamini-Hochberg False Discovery Rate procedure with  $\alpha = 0.05$ .

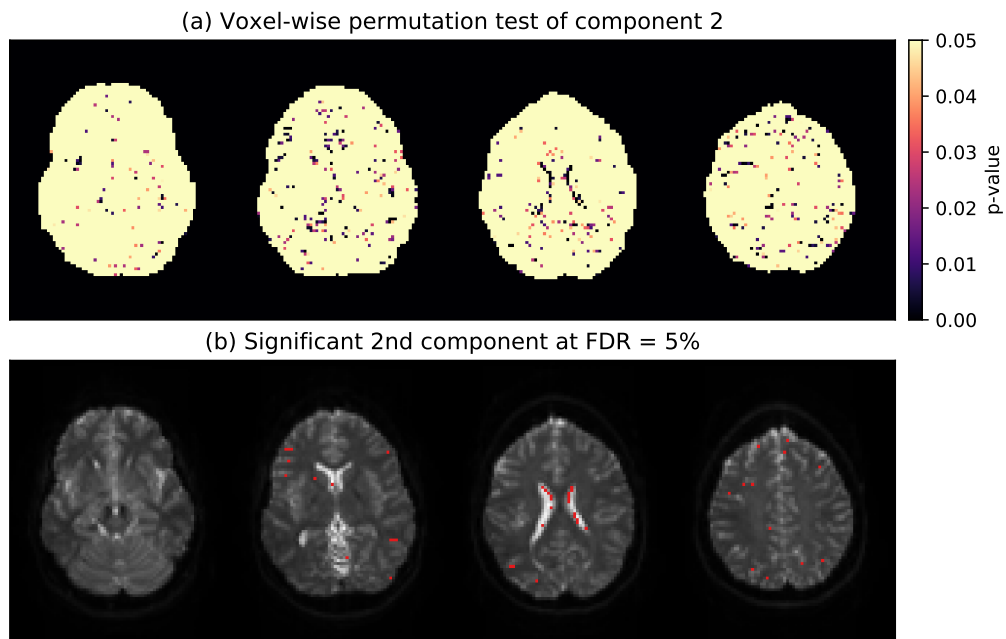

Figure S.7: Permutation testing in Subject 3 to determine if component 2 contains any meaningful structure. (a)  $p$ -value of a voxel-wise residual bootstrapping test. (b) Significant voxels ( $\alpha = 0.05$ ; shown in red) overlaid onto the mean  $b = 0$  image. Significance is determined after correcting for multiple comparisons using the Benjamini-Hochberg False Discovery Rate procedure with  $\alpha = 0.05$ .

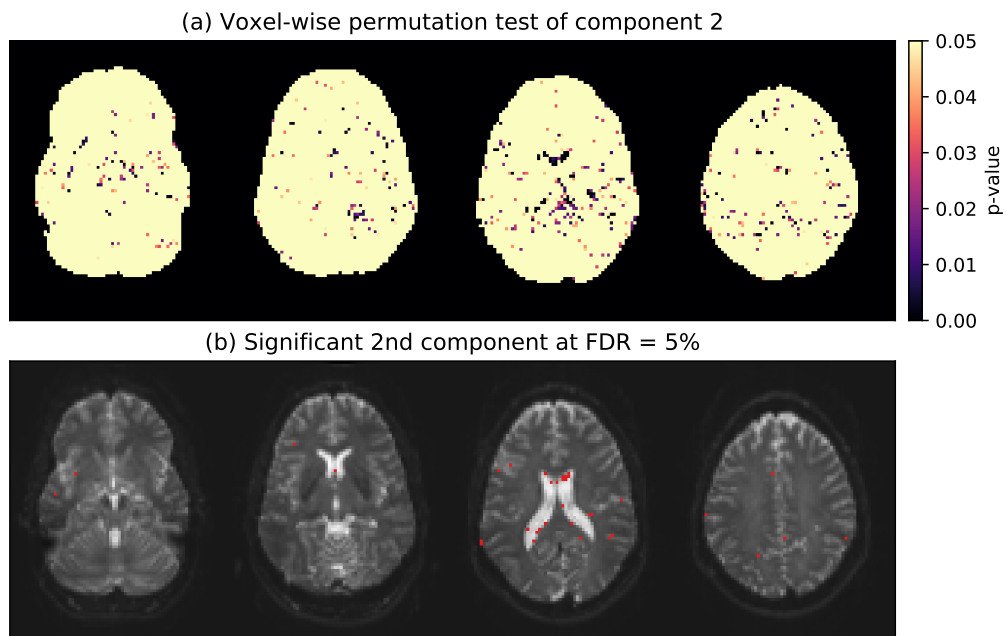

Figure S.8: Permutation testing in Subject 4 to determine if component 2 contains any meaningful structure. (a)  $p$ -value of a voxel-wise residual bootstrapping test. (b) Significant voxels ( $\alpha = 0.05$ ; shown in red) overlaid onto the mean  $b = 0$  image. Significance is determined after correcting for multiple comparisons using the Benjamini-Hochberg False Discovery Rate procedure with  $\alpha = 0.05$ .
